# Supplementary material
Source: ML conference proceedings conference paper supplement (https://proceedings.mlr.press/v161/agrawal21a.html)
Supplement: Supplementary file [file agrawal21a-supp.pdf]

---

# Known unknowns: Learning novel concepts using reasoning-by-elimination

## Supplementary Material

---

Harsh Agrawal<sup>1,2</sup>

Eli A. Meirom<sup>1</sup>

Yuval Atzmon<sup>1</sup>

Shie Mannor<sup>1</sup>

Gal Chechik<sup>1</sup>

<sup>1</sup>NVIDIA Research, Israel  
<sup>2</sup>Georgia Tech, Georgia, USA

## 1 ARCHITECTURE DETAILS

**For the textual encoder**, we use the first three layers of a pretrained BERT model [Devlin et al., 2019] to extract the text encoding of the attributes mentioned in the instruction. We feed each attribute (color or shape) individually through a BERT model and use the 768-dimensional output feature corresponding to the [CLS] token as the textual encoding. The first token of every sequence is always a special classification token ([CLS]). The final hidden state corresponding to this token is often used as the aggregate sequence representation for classification tasks [Devlin et al., 2019]. We then project this vector to a more compact 32-dimensional vector. The projection module comprises of a linear layer followed by ReLU non-linearity, Layer Norm [Ba et al., 2016] and another linear layer.

**The visual encoder** is a CNN model comprised of three convolutional layers, each followed by ReLU non-linearity. The output of the final convolutional layer is flattened and passed through a linear layer followed by ReLU non-linearity to obtain a 512-dimensional vector. Similar to the text-encoder, we use a non-linear projection module to project the visual representation of the image,  $\mathbf{x} \in \mathbb{R}^{512}$ , to the individual shape and color representations  $\mathbf{v}^S, \mathbf{v}^C \in \mathbb{R}^{32}$ .

**The policy** obtains the 32-dimensional state-embedding from  $4 \times |\mathcal{O}|$ -dimensional object tuple by passing through a projection layer. It consists of two linear layers separated by a ReLU non-linearity. Similarly, the agent’s position embedding is obtained by learning an embedding layer that encodes the agent’s position  $p \in [0, 5)$  into a 16-dimensional vector. Finally, the 16-dimensional instruction embedding is obtained by passing the 2-dimensional instruction tuple through a similar projection layer. These three features are concatenated to form a 64-dimensional input to the recurrent policy. For the policy, we use a single layer GRU [Cho et al., 2014] with a 64 dimensional hidden state. The policy is parameterized by a GRU [Cho et al., 2014]. The GRU output is used to produce a softmax distribution over the action space  $\mathcal{A}$  and an estimate of the value function.

## 2 HYPER-PARAMETERS

Next, we list down the important hyper-parameters associated with training the RL policy.

| Hyperparameter                        | Value        |
|---------------------------------------|--------------|
| <i>PPO</i>                            |              |
| Clip parameter Schulman et al. [2017] | 0.2          |
| Rollout timesteps                     | 128          |
| Epochs                                | 2            |
| Value loss coefficient                | 0.5          |
| Discount factor ( $\gamma$ )          | 0.99         |
| GAE parameter ( $\lambda$ )           | 0.95         |
| Normalize advantage                   | False        |
| <i>Training</i>                       |              |
| Optimizer                             | Adam         |
| $(\beta_1, \beta_2)$ for Adam         | (0.9, 0.999) |
| Learning rate                         | $1.0e^{-4}$  |
| Gradient clip norm                    | 0.2          |

## References

- Jimmy Ba, J. Kiros, and Geoffrey E. Hinton. Layer normalization. *ArXiv*, abs/1607.06450, 2016.
- Kyunghyun Cho, B. V. Merriënboer, Çağlar Gülçehre, Dzmitry Bahdanau, Fethi Bougares, Holger Schwenk, and Yoshua Bengio. Learning phrase representations using rnn encoder-decoder for statistical machine translation. *ArXiv*, abs/1406.1078, 2014.
- J. Devlin, Ming-Wei Chang, Kenton Lee, and Kristina Toutanova. Bert: Pre-training of deep bidirectional transformers for language understanding. In *NAACL-HLT*, 2019.
- John Schulman, F. Wolski, Prafulla Dhariwal, A. Radford, and O. Klimov. Proximal policy optimization algorithms. *ArXiv*, abs/1707.06347, 2017.
